# Supplementary material
Source: publisher site journal article supplement (http://static.cambridge.org/content/id/urn:cambridge.org:id:article:S0899823X19001363/resource/name/S0899823X19001363supp003.docx)
Supplement: Supplementary file 1 [file S0899823X19001363supp003.docx]

**Supplemental Table 1:** Univariate logistic regression analysis for patient and infection characteristics associated with 30-day mortality

|  | OR (95% CI) | P value |
| --- | --- | --- |
| Patient Characteristics |  |  |
| Age ≥ 60 years | 2.91 (1.25-6.79) | **0.014** |
| Male | 1.11 (0.52-2.38) | 0.783 |
| Medical Comorbidities |  |  |
| Chronic Kidney Disease | 1.08 (0.35-3.36) | 0.893 |
| Immunosuppressed | 1.47 (0.68-3.21) | 0.329 |
| Solid organ malignancy | 1.78 (0.73-4.33) | 0.201 |
| Bone marrow transplant | 1.03 (0.12-8.82) | 0.981 |
| Prosthetic Joint | 0.75 (0.16-3.45) | 0.716 |
| No medical comorbidities | 0.44 (0.10-1.94) | 0.278 |
| Infection Characteristics |  |  |
| Nosocomial infection | 2.10 (0.86-5.15) | 0.105 |
| MRSA | 1.54 (0.72-3.30) | 0.262 |
| Sepsis | 5.54 (2.27-12.44) | **<0.001** |
| Septic shock | 4.19 (1,26-13,96) | **0.02** |
| Intensive Care Unit | 4.41 (2.02-9.64) | **<0.001** |
| Bacteremia > 3 days | 2.50 (1.06-5.89) | **0.037** |
| Management and Outcomes |  |  |
| Infectious Diseases Consult (IDC) | 0.45 (0.20-0.97) | **0.042** |
| Antimicrobial Stewardship Team (AST) | 0.20 (0.03-1.55) | 0.124 |
| IDC/AST | 0.40 (0.18-0.87) | **0.021** |
| Appropriate definitive antibiotics | 2.37 (0.30-18.68) | 0.412 |
| Planned treatment duration of >= 28 days | 0.79 (0.27-2.31) | 0.662 |
